# Supplementary material
Source: PubMed Central journal article supplement (PMC8025546)
Supplement: NIHMS1048505-supplement-1.pdf [file NIHMS1048505-supplement-1.pdf]

# Supplemental Material for “Adversarial Time-to-Event Modeling”

## A. Missing data and DATE-AE

DATE-AE extends DATE by jointly learning the mapping  $x \rightarrow z \rightarrow t$ , where  $z$  is modeled as an adversarial auto-encoder. For imputation, the covariates (entries of  $x$ ) in the encoder are set to zero if the entry is missing. When evaluating the reconstruction loss  $\gamma_3$  in (1), we only do so for observed covariates; in this way the autoencoder can learn the correlation structure of the observed data despite missingness and without the need for imputation, while letting the decoder,  $x = \text{decoder}(z)$ , handle the imputation if needed. Note that for time-to-event prediction, at test time, we do not have to impute missing values as we can directly evaluate  $x \rightarrow z \rightarrow t$ . DATE-AE, extends DATE formulation with additional autoencoder discriminator and generator losses shown below:

$$\begin{aligned} \gamma_1(\theta_x, \theta_z, \psi; \mathcal{D}) &= \mathbb{E}_{(x, \tilde{z})} [D_\psi(x, \tilde{z})] \\ &\quad + \mathbb{E}_{(\tilde{x}, z)} [1 - D_\psi(\tilde{x}, z)], \\ \gamma_2(\theta_x, \theta_z; \mathcal{D}) &= \mathbb{E}_{(z \sim p(z), \tilde{z})} [d(z, \tilde{z})], \\ \gamma_3(\theta_x, \theta_z; \mathcal{D}) &= \mathbb{E}_{(x \sim p(x), \hat{x})} [d(x, \hat{x})], \\ \min_{\theta_x, \theta_z} \max_{\psi} \gamma(\theta_x, \theta_z, \psi; \mathcal{D}) &= \gamma_1(\theta_x, \theta_z, \psi; \mathcal{D}) \\ &\quad + \zeta_2 \gamma_2(\theta_x, \theta_z; \mathcal{D}) \\ &\quad + \zeta_3 \gamma_3(\theta_x, \theta_z; \mathcal{D}), \end{aligned} \quad (1)$$

where  $x \sim p(x)$ ,  $\tilde{z} = G_{\theta_x}(x, \epsilon_x)$ ,  $z \sim p(z)$ ,  $\tilde{x} = G_{\theta_z}(z, \epsilon_z)$ ,  $\epsilon$  is the noise source,  $d$  is the distortion measure and  $\{\zeta_2, \zeta_3\}$  are reconstruction tuning parameters.

Tables 1 and 2 compares the effects of randomly introducing missing values on the FLchain relative absolute error and concordance-index respectively.

## B. Concordance index and relative absolute error

Tables 3 and 4 show comparisons on concordance-index and relative absolute error across all datasets.

## C. Normalized Relative Error (NRE)

Figures 2, 3, 4 and 5, show comparison on NRE distributions for both censored and non-censored events.

## D. Test set time-to-event distributions

We randomly draw best and worst observation samples based on the NRE metric. Figures 6, 7, 8 and 9, show the corresponding distributions comparisons relative to the ground truth or censored time  $t^*$ .

## E. Effects of noise source and stochastic layers

Figure 1 shows the contribution effects of stochastic layers for noise Uniform(0,1) on both censored and non-censored time-to-event distributions. Tables 5 and 6 compares noise sources on relative absolute error and CI.

Table 1. Introduced proportion of missing values comparison on FLchain relative absolute error. Ranges in parentheses are 50% empirical ranges over (median) test-set predictions.

|              | 0.10                              | 0.20                              | 0.30                               | 0.50                              |
|--------------|-----------------------------------|-----------------------------------|------------------------------------|-----------------------------------|
| Non-Censored |                                   |                                   |                                    |                                   |
| DATE         | 19.9 <sub>(9.6,32.7)</sub>        | <b>19.8</b> <sub>(9.1,33.7)</sub> | <b>19.7</b> <sub>(10.8,33.2)</sub> | 19.7 <sub>(10.3,33.5)</sub>       |
| DATE-AE      | <b>19.2</b> <sub>(9.6,34.9)</sub> | 21.9 <sub>(9.5,33.4)</sub>        | 20.6 <sub>(9.7,32.8)</sub>         | <b>18.3</b> <sub>(9.5,32.9)</sub> |
| DRAFT        | 32.9 <sub>(10.0,92.3)</sub>       | 34.1 <sub>(11.5,119.8)</sub>      | <b>19.7</b> <sub>(10.3,33.5)</sub> | 19.7 <sub>(10.3,33.5)</sub>       |
| Censored     |                                   |                                   |                                    |                                   |
| DATE         | <b>0</b> <sub>(0,20.4)</sub>      | 1.9 <sub>(0,19.4)</sub>           | 2.7 <sub>(0,20.1)</sub>            | 7.3 <sub>(0,21.8)</sub>           |
| DATE-AE      | <b>0</b> <sub>(0,12.9)</sub>      | 3 <sub>(0,19)</sub>               | <b>2.1</b> <sub>(0,16.5)</sub>     | <b>6</b> <sub>(0,21.3)</sub>      |
| DRAFT        | <b>0</b> <sub>(0,0)</sub>         | <b>0</b> <sub>(0,0)</sub>         | 7.3 <sub>(0,21.8)</sub>            | 7.3 <sub>(0,21.8)</sub>           |

Table 2. Introduced proportion of missing values comparison on FLCHAIN Concordance-Index.

|         | 0.10         | 0.20         | 0.30         | 0.50         |
|---------|--------------|--------------|--------------|--------------|
| DATE    | 0.815        | 0.803        | <b>0.803</b> | 0.784        |
| DATE-AE | 0.814        | 0.804        | 0.799        | <b>0.785</b> |
| DRAFT   | <b>0.822</b> | <b>0.807</b> | 0.801        | 0.783        |

Table 3. Concordance-Index results on test data.

|         | DATE        | DATE-AE     | DRAFT       | Cox-Efron   | RSF  |
|---------|-------------|-------------|-------------|-------------|------|
| EHR     | <b>0.78</b> | <b>0.78</b> | 0.76        | 0.75        | -    |
| FLCHAIN | <b>0.83</b> | <b>0.83</b> | <b>0.83</b> | <b>0.83</b> | 0.82 |
| SUPPORT | 0.84        | 0.83        | <b>0.86</b> | 0.84        | 0.80 |
| SEER    | <b>0.83</b> | <b>0.83</b> | <b>0.83</b> | 0.82        | 0.82 |

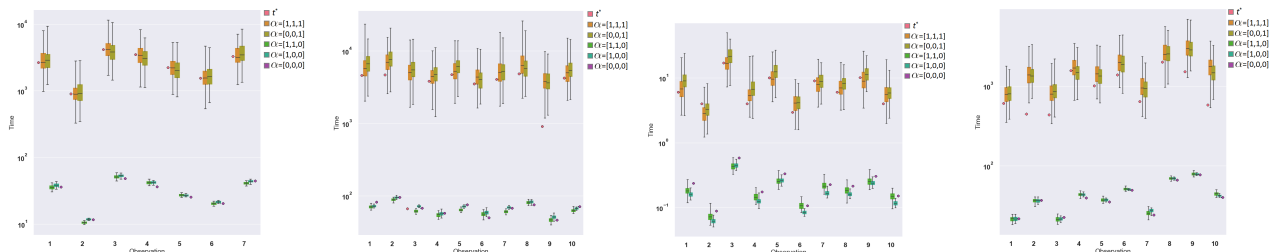

(a) Non-Censored

(b) Censored

(c) Non-Censored

(d) Censored

Figure 1. Effects of stochastic layers on uncertainty estimation on 10 randomly selected test-set subjects from the FLCHAIN ( (a) and (b) ) and SUPPORT ( (c) and (d) ) datasets. Ground truth times are denoted as  $t^*$  and box plots represent time-to-event distributions from a 2-layer model, where  $\alpha = [\alpha_0, \alpha_1, \alpha_2]$  indicates whether the corresponding noise source,  $\{\epsilon_0, \epsilon_1, \epsilon_2\}$ , is active. For example  $\alpha = [1, 0, 0]$  indicates noise on the input layer only.

Table 4. Median relative absolute errors (as percentages of  $t_{\max}$ ), on non-censored and censored data. Ranges in parentheses are 50% empirical ranges over (median) test-set predictions.

|              | DATE                    | DATE-AE                | DRAFT            |
|--------------|-------------------------|------------------------|------------------|
| Non-censored |                         |                        |                  |
| EHR          | <b>23.6</b> (11.1,43.0) | 24.5 (12.4,44.0)       | 36.7 (16.1,81.3) |
| FLCHAIN      | 19.5 (9.5,31.1)         | <b>19.3</b> (8.9,32.4) | 26.2 (9.0,53.5)  |
| SUPPORT      | 2.7 (0.4,16.1)          | <b>1.5</b> (0.4,19.2)  | 2.0 (0.2,35.3)   |
| SEER         | <b>18.6</b> (8.3,34.1)  | 20.2 (10.3,35.8)       | 23.7 (9.9,51.2)  |
| Censored     |                         |                        |                  |
| EHR          | 12.4 (0,38.7)           | 1.6 (0,34.)            | <b>0</b> (0,0)   |
| FLCHAIN      | 0 (0,18.8)              | 0 (0,15.6)             | <b>0</b> (0,0)   |
| SUPPORT      | 0 (0,13.0)              | 0 (0,8.8)              | <b>0</b> (0,0)   |
| SEER         | <b>0</b> (0,0)          | <b>0</b> (0,0)         | <b>0</b> (0,0)   |

Table 5. Effects of noise source and stochastic layers on SUPPORT Median relative absolute error. Ranges in parentheses are 50% empirical ranges over (median) test-set predictions.

|              | Uniform(-1,1)     | Uniform(0,1)          | Gaussian(0,1)     |
|--------------|-------------------|-----------------------|-------------------|
| Non-censored |                   |                       |                   |
| All          | 2.4 (0.4,19.9)    | 2.2 (0.5,19.2)        | 1.9 (0.4,17.)     |
| Input        | 2.2 (0.4,18.)     | <b>1.8</b> (0.4,16.1) | 1.9 (0.4,14.9)    |
| Output       |                   | 2.6 (0.4,21.1)        |                   |
| Censored     |                   |                       |                   |
| All          | <b>0</b> (0,14.6) | <b>0</b> (0,13.7)     | <b>0</b> (0,16.4) |
| Input        | <b>0</b> (0,15.3) | 1.2 (0,22.4)          | 0.8 (0,21.2)      |
| Output       |                   | <b>0</b> (0,8.2)      |                   |

Table 6. Effects of noise source and stochastic layers on SUPPORT concordance-index.

|        | Uniform(-1,1) | Uniform(0,1) | Gaussian(0,1) |
|--------|---------------|--------------|---------------|
| All    | 0.825         | <b>0.835</b> | 0.826         |
| Input  | 0.841         | 0.829        | 0.825         |
| Output |               | <b>0.836</b> |               |

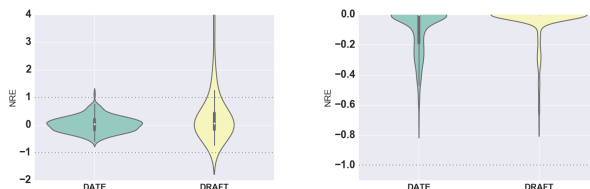

(a) Non-Censored

(b) Censored

Figure 2. Normalized relative error on FLCHAIN test data.

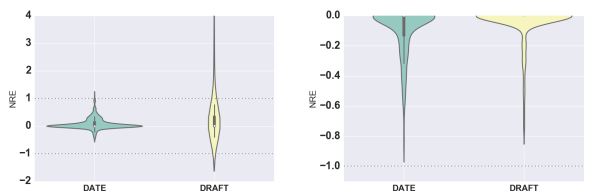

(a) Non-Censored

(b) Censored

Figure 3. Normalized relative error on SUPPORT test data.

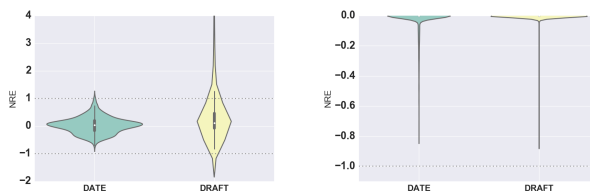

(a) Non-Censored

(b) Censored

Figure 4. Normalized relative error on SEER test data.

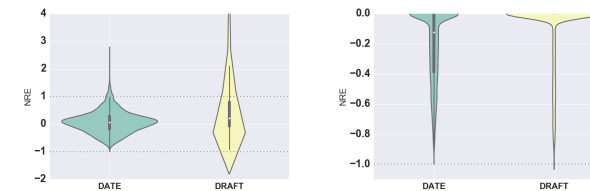

(a) Non-Censored

(b) Censored

Figure 5. Normalized relative error on EHR test data.

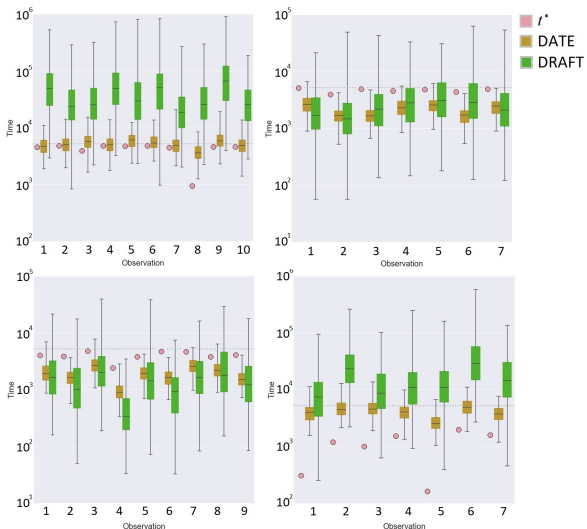

Figure 6. Comparison on FLCHAIN Censored best (top-left), worst (top-right) and Non-Censored best (bottom-left), worst (bottom-right).

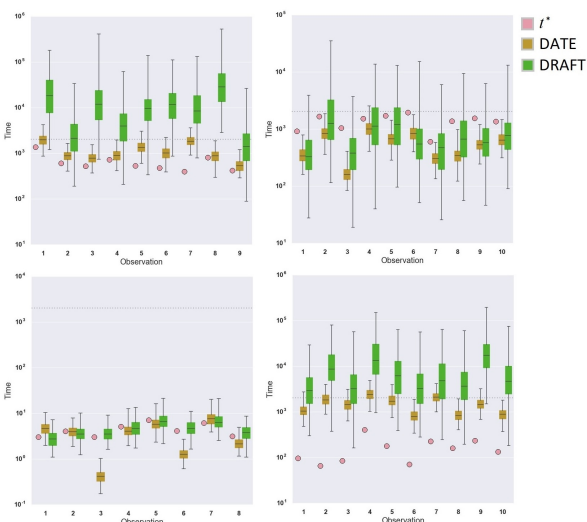

Figure 7. Comparison on SUPPORT Censored best (top-left), worst (top-right) and Non-Censored best (bottom-left), worst (bottom-right).

### F. Parametric examples of $f$ , $h$ and $S$ relationships

Figure 10 shows examples of exponential, Weibull and log-normal time-to-event pdf  $f_T(t|\theta)$  with corresponding survival function  $S_T(t|\theta)$  and  $h(t|\theta)$ , where  $\theta$  are the pdf parameters and  $T$  is the time-to-event random variable.

### G. Architecture of the neural network

In all experiments, DATE and DRAFT are specified in terms of two-layer MLPs of 50 hidden units with Rectified Linear

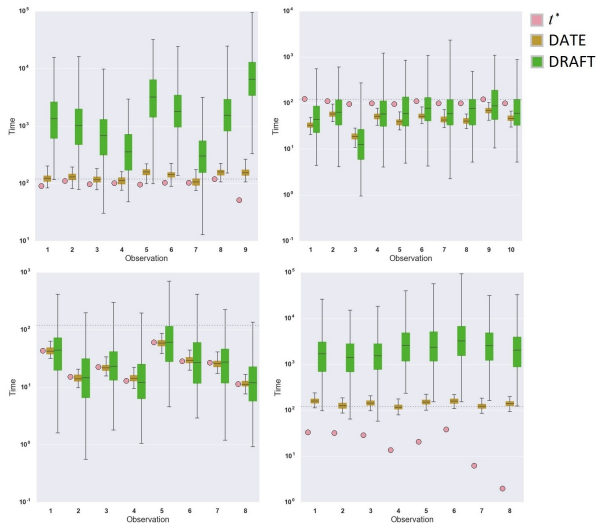

Figure 8. Comparison on SEER Censored best (top-left), worst (top-right) and Non-Censored best (bottom-left), worst (bottom-right).

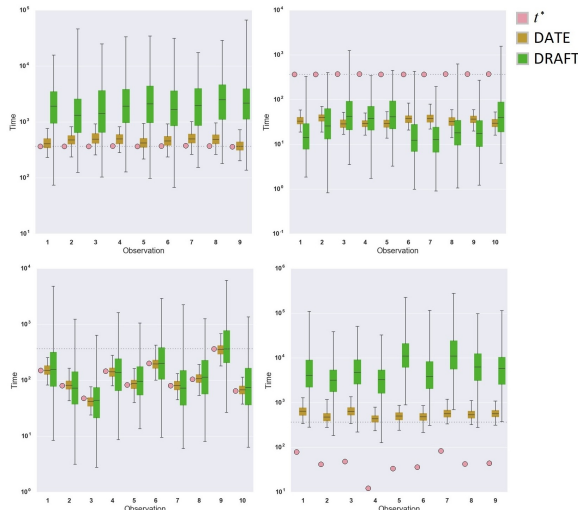

Figure 9. Comparison on EHR Censored best (top-left), worst (top-right) and Non-Censored best (bottom-left), worst (bottom-right).

Unit (ReLU) activation functions and batch normalization (Ioffe & Szegedy, 2015). The discriminator for DATE is a similarly defined MLP. As an optimizer, we use Adam (Kingma & Adam, 2015) with the following hyperparameters: learning rate  $3 \times 10^{-4}$ , first moment 0.9, second moment 0.99, and epsilon  $1 \times 10^{-8}$ . Further, we set the minibatch size to  $M = 350$  and use dropout with  $p = 0.8$  on all layers. All the network weights are initialized using Xavier (Glorot & Bengio, 2010). Datasets are split into training, validation and test sets as 80%, 10% and 10% partitions, respectively, stratified by non-censored event proportion. We use the validation set for early stopping and learning model hyperparameters. DATE is executed using one NVIDIA P100 GPU with 16GB memory.

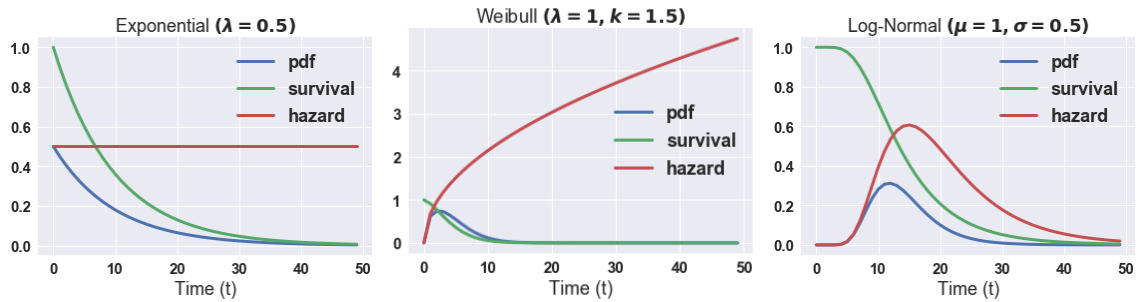

Figure 10. Popular parametric characterizations: exponential (left), Weibull (middle) and log-normal (right).

## References

- Glorot, Xavier and Bengio, Yoshua. Understanding the difficulty of training deep feedforward neural networks. In *AISTATS*, 2010.
- Ioffe, Sergey and Szegedy, Christian. Batch normalization: Accelerating deep network training by reducing internal covariate shift. In *ICML*, 2015.
- Kinga, D and Adam, J Ba. A method for stochastic optimization. In *ICLR*, 2015.
